# Supplementary material for: Prebiotics improve frailty status in community-dwelling older individuals in a double-blind, randomized, controlled trial
Source: JCI journal article supplement (doi:10.1172/jci176507), 2024-08-06
Supplement: sd1 [file 1]

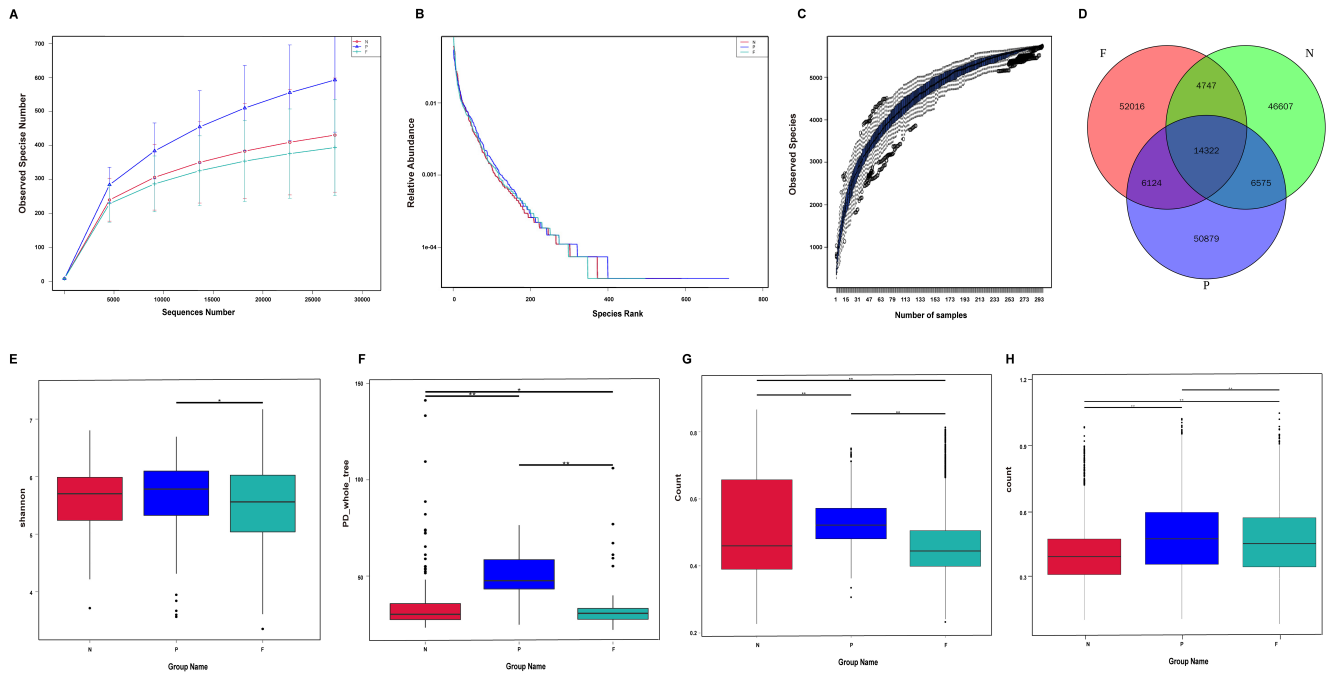

### Supplemental Figure1 OTU analysis and diversity between three groups

N: nonfrailty, P: prefrailty, F: frailty; A: Block dilution curve, B: Group rank clustering curve, C: Species accumulation box chart, D: Venn diagram of OTUs distribution in three groups, E: Shannon index box plot of differences between groups, F: Box plot of differences between groups in PD Whole Tree index, G: Group differences in unweighted Beta diversity, H: Group differences in weighted Beta diversity

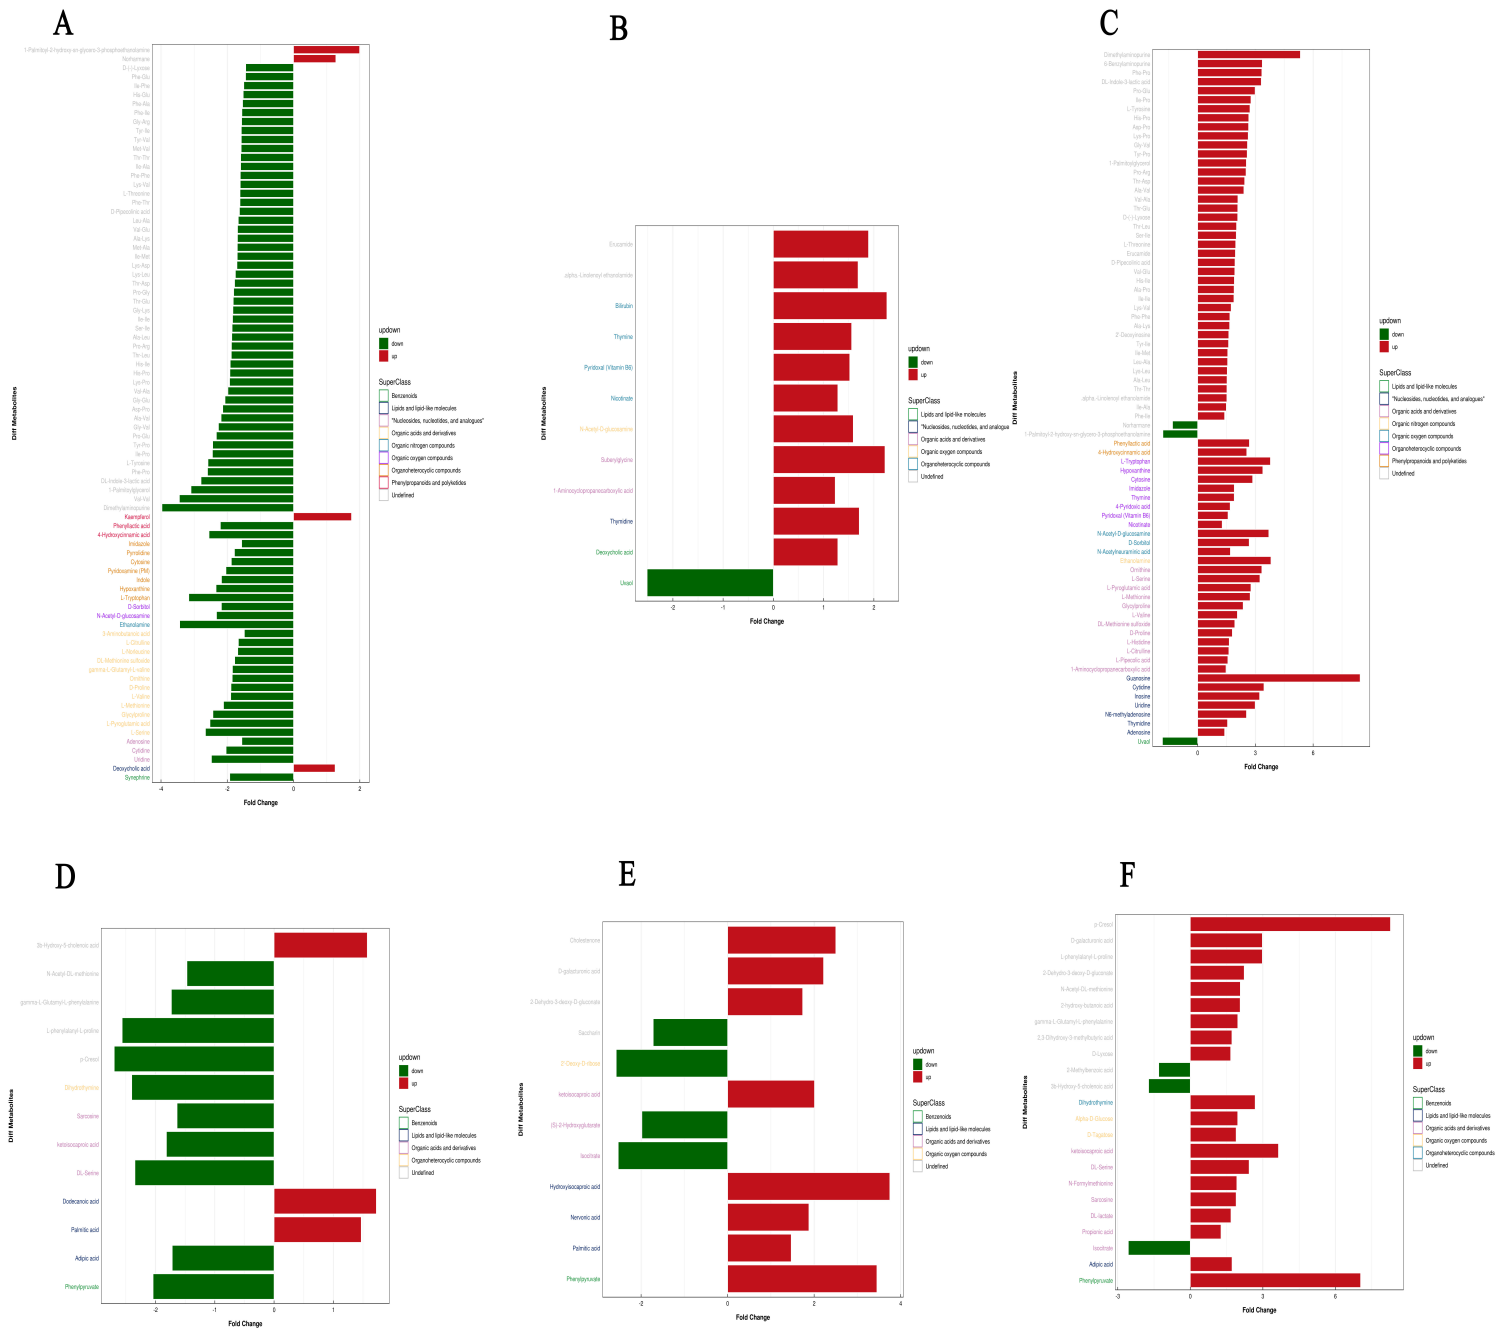

**Supplemental Figure2 The abundance of bacteria and species analysis between the three groups**

N: nonfrailty, P: prefrailty, F: frailty; A: Bar chart of relative abundance of dominant species pairs from Phylum level, B: Bar chart of relative abundance of dominant species pairs from Genus's level, C: Bar chart of relative abundance of dominant species pairs from Species level, D: Genus level microbiota clustering heat map, E: Family level microbiota clustering heat map, F: Phylum level analysis between group N and P, G: Phylum level analysis between group N and F, H: Phylum level analysis between group P and F, I: Species level analysis between group N and P, J: Species level analysis between group N and F, K: Species level analysis between group P and F, L: Evolutionary branching diagram of groups N and F, M: Evolutionary branching diagram of groups P and F

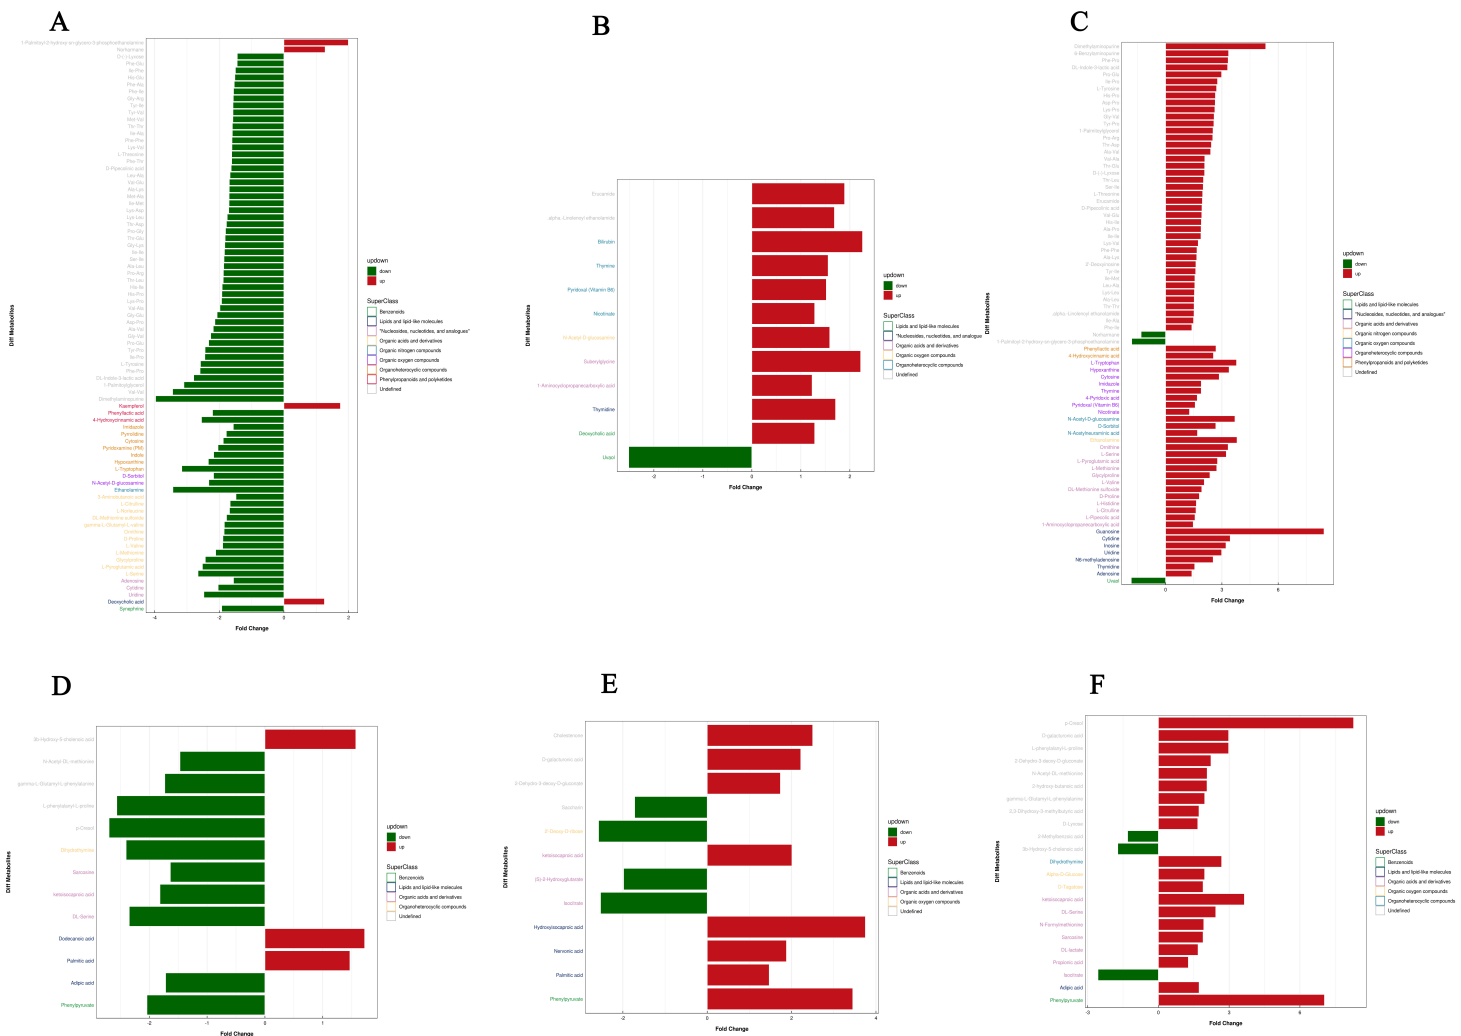

**Supplemental Figure3 The metabolites between groups of different frailty states**

N: nonfrailty, P: prefrailty, F: frailty; A: Positive ion mode between group N and P, B: Positive ion mode between group N and F, C: Positive ion mode between group P and F, D: Anion ion mode between group N and P, E: Anion ion mode between group N and F, F: Anion ion mode between group P and F)

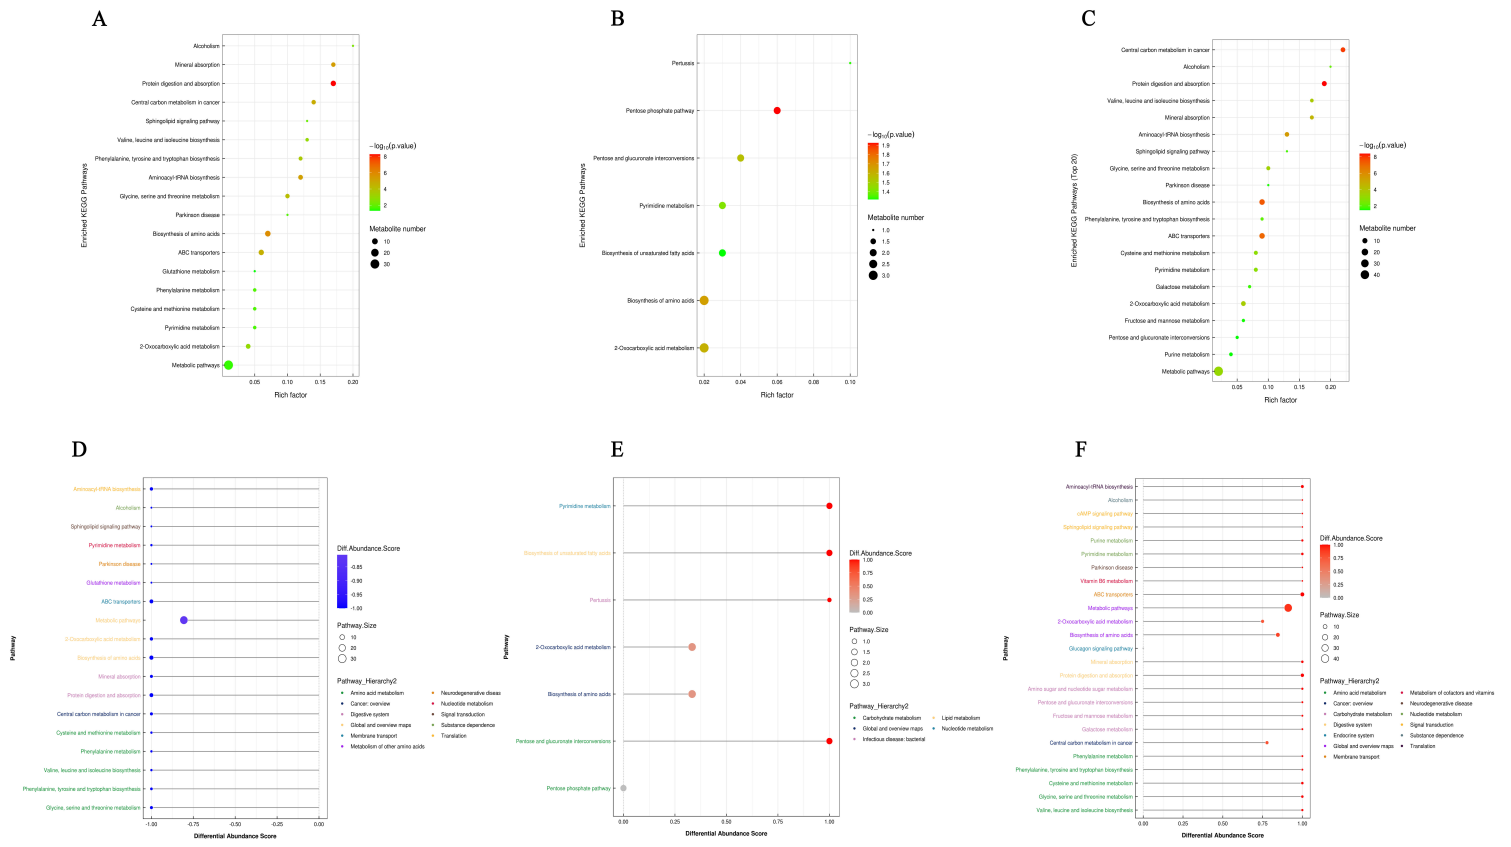

### Supplemental Figure 4 KEGG pathway enrichment analysis

N: nonfrailty, P: prefrailty, F: frailty; A: Bubble diagram of KEGG enrichment pathway between group N and P, B: Bubble diagram of KEGG enrichment pathway between group N and F, C: Bubble diagram of KEGG enrichment pathway between group P and F, D: Differential abundance score plot of all differential metabolic pathways between group N and P, E: Differential abundance score plot of all differential metabolic pathways between group N and F, F: Differential abundance score plot of all differential metabolic pathways between group P and F

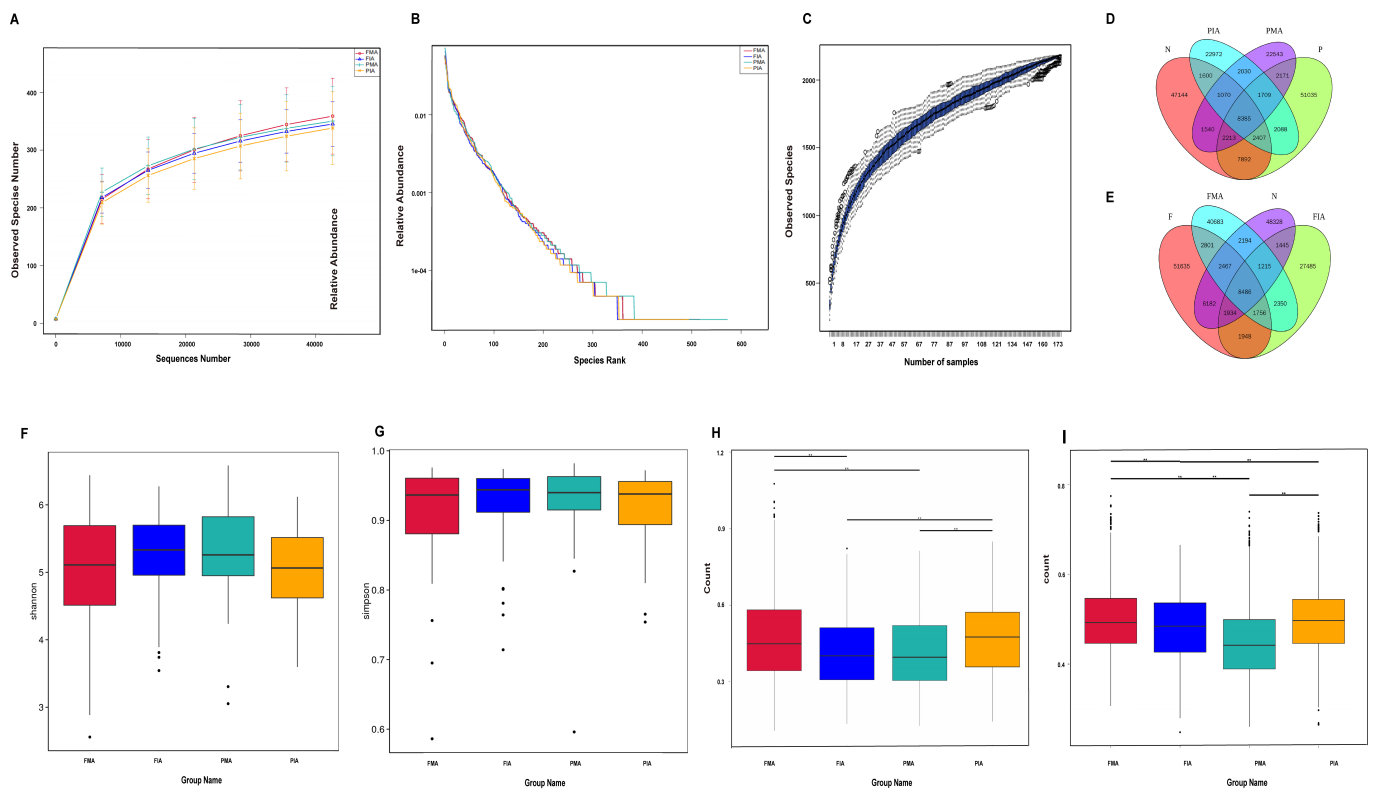

### Supplemental Figure 5 OTU analysis and diversity between four groups after interventions

PI: prefrailty group before receive prebiotic intervention; PM: prefrailty group before receive placebo intervention; FI: frailty group before receive prebiotic intervention; FM: frailty group before receive placebo intervention; PIA, PI group after receive prebiotic intervention. PMA, PM group after receive placebo intervention. FIA, FI group after receive prebiotic intervention. FMA, FM group after receive placebo intervention. A: Block dilution curve, B: Group rank clustering curve, C: Species accumulation box chart, D and E: Venn diagram of OTUs distribution between groups, F: Shannon index box plot of differences between groups, G: Simpson index box plot of differences between groups, H: Group differences in weighted Beta diversity, I: Group differences in unweighted Beta diversity

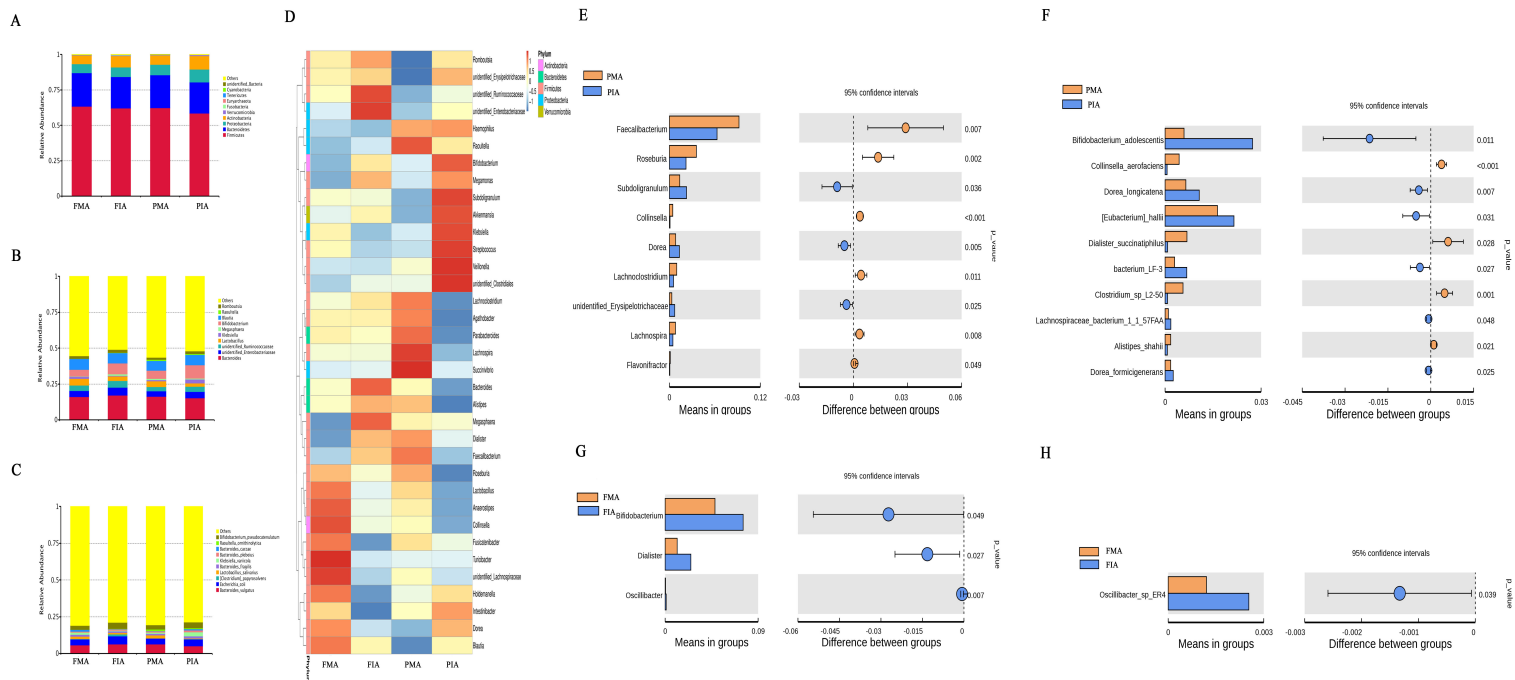

**Supplemental Figure 6 The abundance and species analysis of bacteria in four groups after interventions**

PI: prefrailty group before receive prebiotic intervention; PM: prefrailty group before receive placebo intervention; FI: frailty group before receive prebiotic intervention; FM: frailty group before receive placebo intervention; PIA, PI group after receive prebiotic intervention. PMA, PM group after receive placebo intervention. FIA, FI group after receive prebiotic intervention. FMA, FM group after receive placebo intervention. A: Bar chart of relative abundance of dominant species pairs (Phylum level), B: Bar chart of relative abundance of dominant species pairs (Genus level), C: Bar chart of relative abundance of dominant species pairs (Species level), D: Genus level microbiota clustering heat map, E: Genus level analysis between group PMA and PIA, F: Species level analysis between group PMA and PIA, G: Genus level analysis between group FMA and FIA, H: Species level analysis between group FMA and FIA.





**Supplementary Table 1 Intake of food and major nutrients among groups with different frailty states****[M(Q1,Q3)]**

|                   | N (n=100)                 | P (n=100)                 | F (n=100)                         | Z     | P     |
|-------------------|---------------------------|---------------------------|-----------------------------------|-------|-------|
| Staple Food (g)   | 330.35(227.10, 445.85 )   | 318.35(240.83, 462.25)    | 353.35(230.83, 536.68)            | 1.834 | 0.400 |
| Vegetables (g)    | 149.15(75.80, 205.02)     | 135.00(64.15, 202.90)     | 151.65(83.30, 285.85)             | 4.601 | 0.100 |
| Fruit (g)         | 66.70(0.00, 166.70)       | 83.30(0.83, 150.00)       | 75.00(0.00, 200.00)               | 2.129 | 0.345 |
| Eggs (g)          | 28.35(0.00, 50.00)        | 33.30(8.73, 50.00)        | 33.30(16.70, 66.70)               | 5.550 | 0.062 |
| Meat (g)          | 16.70(0.00, 45.45)        | 16.70(0.00, 41.93)        | 16.70(0.00, 50.00)                | 1.440 | 0.487 |
| Beans (g)         | 8.35(0.00, 45.83)         | 0.00(0.00, 33.30)         | 0.00(0.00, 59.18)                 | 1.138 | 0.566 |
| Milk (g)          | 83.30(0.00, 166.70)       | 83.30(0.00, 205.02)       | 166.70(0.00, 250.00) <sup>a</sup> | 9.392 | 0.009 |
| Oil (g)           | 13.30(6.70, 24.58)        | 13.30(6.70, 22.48)        | 13.30(6.70, 26.70)                | 2.090 | 0.352 |
| Energy (kcal)     | 1537.30(1126.00, 1893.45) | 1490.70(1270.35, 1788.30) | 1589.75(1199.40, 2149.98)         | 2.017 | 0.365 |
| Protein (g)       | 44.90(36.30, 59.28)       | 44.80(38.38, 57.03)       | 51.35(37.53, 69.33)               | 5.077 | 0.079 |
| Fat (g)           | 38.30(24.25, 57.48)       | 35.00(23.93, 49.85)       | 40.80(28.05, 63.23)               | 4.974 | 0.083 |
| Carbohydrates (g) | 254.25(172.33, 322.48)    | 244.75(189.20, 300.38)    | 261.25(178.63, 373.78)            | 1.357 | 0.507 |
| Dietary Fiber (g) | 7.80(5.32, 11.98)         | 7.65(5.00, 11.28)         | 9.00(4.43, 15.45)                 | 1.861 | 0.394 |

Compared with N, <sup>a</sup> P < 0.05; Compared with P, <sup>b</sup>P < 0.05.

**Supplementary table 2 Baseline comparison of frailty index, scales and body composition in prefrail group**

|                                                | PM (n=50)            | PI (n=50)            | t/Z/ $\chi^2$ | P    |
|------------------------------------------------|----------------------|----------------------|---------------|------|
| Age (years) [M(Q1,Q3)]                         | 73.00 (68.75, 80.25) | 73.00 (71.00, 77.00) | -0.19         | 0.85 |
| Gender (male, %)                               | 17 (34%)             | 23 (46%)             | 1.5           | 0.22 |
| Shrinking (weight loss)                        | 4 (8%)               | 8 (16%)              | 1.52          | 0.36 |
| Low activity (n, %)                            | 19 (38%)             | 13 (26%)             | 1.65          | 0.28 |
| Slowness (walking time) (s, $\bar{x}\pm s$ )   | 5.72 $\pm$ 1.03      | 5.90 $\pm$ 1.28      | -0.77         | 0.41 |
| Weakness (grip strength) (kg, $\bar{x}\pm s$ ) | 19.21 $\pm$ 6.70     | 21.11 $\pm$ 7.24     | -1.37         | 0.18 |
| Poor endurance [M(Q1,Q3)]                      | 0.00 (0.00, 2.00)    | 0.00 (0.00, 2.00)    | -1.21         | 0.29 |
| ADL ( $\bar{x}\pm s$ )                         | 97.40 $\pm$ 5.82     | 97.90 $\pm$ 3.92     | -0.5          | 0.62 |
| SAS ( $\bar{x}\pm s$ )                         | 32.01 $\pm$ 7.99     | 30.24 $\pm$ 8.32     | 1.12          | 0.27 |
| GDS ( $\bar{x}\pm s$ )                         | 7.68 $\pm$ 4.64      | 6.96 $\pm$ 3.84      | 0.85          | 0.40 |
| PAC-QOL [M(Q1,Q3)]                             | 10 (0,19)            | 13.00 (3.75, 23.00)  | -0.89         | 0.37 |
| PSQI ( $\bar{x}\pm s$ )                        | 7.24 $\pm$ 2.96      | 7.04 $\pm$ 3.53      | -0.71         | 0.48 |
| Weight (kg, $\bar{x}\pm s$ )                   | 61.93 $\pm$ 10.29    | 63.88 $\pm$ 10.49    | -0.94         | 0.35 |
| BMI (kg/m <sup>2</sup> , $\bar{x}\pm s$ )      | 21.80 $\pm$ 3.67     | 22.35 $\pm$ 4.36     | -0.69         | 0.49 |
| Fat percentage ( $\bar{x}\pm s$ )              | 25.01 $\pm$ 10.10    | 25.02 $\pm$ 10.45    | -0.01         | 1.00 |
| Muscle mass ( $\bar{x}\pm s$ )                 | 43.05 $\pm$ 3.60     | 44.13 $\pm$ 3.59     | -1.49         | 0.14 |
| Bone mass (kg, $\bar{x}\pm s$ )                | 2.67 $\pm$ 0.28      | 2.74 $\pm$ 0.33      | -1.14         | 0.26 |
| Visceral fat grade ( $\bar{x}\pm s$ )          | 6.77 $\pm$ 3.58      | 6.79 $\pm$ 3.51      | -0.02         | 0.98 |
| Basal metabolism (kcal, $\bar{x}\pm s$ )       | 1291.72 $\pm$ 121.93 | 1333.22 $\pm$ 127.78 | -1.66         | 0.10 |
| Body moisture rate ( $\bar{x}\pm s$ )          | 52.97 $\pm$ 7.43     | 53.91 $\pm$ 8.76     | -0.58         | 0.57 |

**Supplementary table 3 Baseline comparison of major dietary components and nutrient intake in prefrailty group[M(Q1,Q3)]**

|                   | PM (n=50)               | PI (n=50)               | Z      | P     |
|-------------------|-------------------------|-------------------------|--------|-------|
| Staple Food (g)   | 313.3 (245, 438.35)     | 320 (233.3, 430)        | -0.176 | 0.860 |
| Vegetables (g)    | 133.3 (60, 206.65)      | 136.7 (66.7, 201.7)     | -0.168 | 0.867 |
| Fruit (g)         | 100 (25, 158.35)        | 66.7 (0, 150)           | -0.804 | 0.421 |
| Eggs (g)          | 33.3 (11.65, 50)        | 41.7 (0, 58.3)          | -0.687 | 0.492 |
| Meat (g)          | 10 (0, 39.15)           | 16.7 (0, 42)            | -1.095 | 0.274 |
| Beans (g)         | 0 (0, 33.3)             | 0 (0, 45)               | -0.566 | 0.571 |
| Milk (g)          | 83.3 (0, 208.35)        | 83.3 (0, 206.7)         | -0.407 | 0.684 |
| Oil (g)           | 6.7 (0, 20)             | 16.7 (10, 25)           | -2.892 | 0.004 |
| Energy (kcal)     | 1470.8 (1272.9, 1796.9) | 1547.3 (1266.7, 1780.8) | -0.394 | 0.693 |
| Protein (g)       | 45 (39.2, 57)           | 44.6 (36.8, 57.2)       | -0.5   | 0.617 |
| Fat (g)           | 33.3 (21.05, 44.7)      | 35.6 (29.5, 51.3)       | -1.062 | 0.288 |
| Carbohydrates (g) | 233.3 (183.95, 336.1)   | 251 (190.4, 298.8)      | -0.144 | 0.885 |
| Dietary Fiber (g) | 8 (5.8, 11.6)           | 6.5 (4.8, 11.4)         | -0.785 | 0.432 |

**Supplementary table 4 Baseline comparison of liver and kidney function and cytokines in prefrailty group**

|                                       | PM (n=50)              | PI(n=50)               | t/Z    | P      |
|---------------------------------------|------------------------|------------------------|--------|--------|
| Albumin/globulin                      | 1.31±0.24              | 1.29±0.17              | 0.384  | 0.701  |
| Albumin (g/L)                         | 43.89±8.12             | 41.71±7.79 b           | 1.37   | 0.174  |
| Alkaline phosphatase (U/L)            | 90.72±39.01            | 83.66±28.74            | 1.03   | 0.305  |
| Alanine aminotransferase (ALT, U/L)   | 22.46±11.99            | 17.16±14.29            | 2.009  | 0.047  |
| Aspartate Aminotransferase (AST, U/L) | 27.14±13.91            | 23.22±10.59            | 1.586  | 0.116  |
| AST/ALT                               | 1.48±0.33              | 1.42±0.44              | 0.775  | 0.44   |
| Urea (mmol/L)                         | 6.10±2.4               | 7.09±3.23              | -1.752 | 0.083  |
| Creatinine (μmol/L)                   | 78.06±26.61            | 89.52±49.66            | -1.438 | 0.154  |
| Cystatin C (mg/L)                     | 1.43±0.38              | 1.52±0.53              | -1.054 | 0.295  |
| Direct bilirubin (μmol/L)             | 4.40 (2.9,6.05)        | 4.05 (2.98,6.13)       | -0.576 | 0.565  |
| Globulin (g/L)                        | 33.81±9.63             | 29.08±7.35             | 2.763  | 0.007  |
| Gamma-glutamyltransferase (U/L)       | 13(7.00,26.50)         | 19.5(11.00,36.25)      | -2.069 | 0.038  |
| Indirect bilirubin (μmol/L)           | 6.55(4.35,9.10)        | 6.25(3.28,10.85)       | -0.065 | 0.948  |
| Total bilirubin (μmol/L)              | 11.20(8.38,15.03)      | 10.75(6.25,17.15)      | -0.458 | 0.647  |
| Total protein (g/L)                   | 75.70±15.06            | 70.79±13.77            | 1.702  | 0.092  |
| Uric acid (μmol/L)                    | 321.98±143.46          | 335.2±133.61           | -0.477 | 0.635  |
| IL-17(pg/ml)                          | 29.45 (17.25, 48.93)   | 30.12 (15.99, 52.09)   | -0.152 | 0.879  |
| γ-IFN (pg/ml)                         | 2.82 (2.21, 4.05)      | 4.05 (3.44, 5.06)      | -4.128 | <0.001 |
| IGF-1(ng/ml)                          | 113.56 (79.32, 148.53) | 102.42 (79.08, 154.86) | -0.031 | 0.975  |

**Supplementary table 5 Baseline comparison of frailty index, scales and body composition in frailty group [M(Q1,Q3)]**

|                                                | FM (n=50)           | FI (n=50)           | t/Z/χ <sup>2</sup> | P    |
|------------------------------------------------|---------------------|---------------------|--------------------|------|
| Age (years) [M(Q1,Q3)]                         | 79.00 (73.75,81.00) | 77.00 (73.00,81.50) | -0.80              | 0.42 |
| Gender (male, %)                               | 19(38%)             | 20(40%)             | 0.84               | 0.47 |
| Shrinking (weight loss)                        | 7(14%)              | 12(24%)             | 2.92               | 0.23 |
| Low activity (n, %)                            | 26(52%)             | 26(52%)             | 0.11               | 1.00 |
| Slowness (walking time) (s, $\bar{x}\pm s$ )   | 7.94±1.79           | 8.23±2.47           | 0.47               | 0.50 |
| Weakness (grip strength) (kg, $\bar{x}\pm s$ ) | 15.64±5.30          | 15.64±6.29          | 0.00               | 1.00 |
| Poor endurance [M(Q1,Q3)]                      | 2.42±0.97           | 2.14±1.17           | 1.64               | 0.20 |
| ADL ( $\bar{x}\pm s$ )                         | 96.00±6.06          | 96.63±4.72          | 0.34               | 0.56 |
| SAS ( $\bar{x}\pm s$ )                         | 1.00 (1.00, 1.00)   | 1.00 (1.00, 1.00)   | 1.01               | 1.00 |
| GDS ( $\bar{x}\pm s$ )                         | 1.00 (1.00, 1.00)   | 1.00 (1.00, 2.00)   | 5.98               | 0.05 |
| PAC-QOL [M(Q1,Q3)]                             | 12.50 (4.00,19.00)  | 13.00 (6.00,26.00)  | -1.40              | 0.16 |
| PSQI ( $\bar{x}\pm s$ )                        | 7.00 (4.00,10.25)   | 8.00 (5.50, 10.00)  | -0.20              | 0.84 |
| Weight (kg, $\bar{x}\pm s$ )                   | 59.37±13.14         | 61.52±14.92         | 0.58               | 0.45 |
| BMI (kg/m <sup>2</sup> , $\bar{x}\pm s$ )      | 20.83±4.66          | 21.53±5.24          | 0.50               | 0.48 |
| Fat percentage ( $\bar{x}\pm s$ )              | 21.70±11.52         | 25.52±10.91         | 2.86               | 0.09 |
| Muscle mass ( $\bar{x}\pm s$ )                 | 42.73±7.23          | 41.84±7.27          | 0.37               | 0.54 |
| Bone mass (kg, $\bar{x}\pm s$ )                | 2.60±0.47           | 2.63±0.51           | 0.06               | 0.80 |
| Visceral fat grade ( $\bar{x}\pm s$ )          | 5.79±3.94           | 6.86±3.86           | 1.85               | 0.18 |
| Basal metabolism (kcal, $\bar{x}\pm s$ )       | 1251.56±258.65      | 1274.76±236.96      | 0.22               | 0.64 |
| Body moisture rate ( $\bar{x}\pm s$ )          | 54.70±12.53         | 50.58±9.97          | 3.26               | 0.07 |

**Supplementary table 6 Baseline comparison of major dietary components and nutrient intake in frailty group[M(Q1,Q3)]**

|                   | FM (n=50)                 | FI (n=50)                | Z      | P     |
|-------------------|---------------------------|--------------------------|--------|-------|
| Staple Food (g)   | 224.55(310.75, 442.95)    | 269.2(400, 581.75)       | -1.958 | 0.050 |
| Vegetables (g)    | 77.08(146.65, 244.58)     | 87.48(200, 395.83)       | -1.372 | 0.170 |
| Fruit (g)         | 0(66.7, 179.15)           | 33.3(121.15, 266.7)      | -1.409 | 0.159 |
| Eggs (g)          | 16.7(37.5, 59.58)         | 1.68(33.3, 74.2)         | -0.244 | 0.807 |
| Meat (g)          | 0(25, 47.93)              | 0(16.7, 64.58)           | -0.768 | 0.443 |
| Beans (g)         | 0(0, 51.28)               | 0(0, 65.03)              | -0.322 | 0.748 |
| Milk (g)          | 0(133.3, 247.5)           | 0(166.7, 250)            | -0.962 | 0.336 |
| Oil (g)           | 10(16.7, 32.05)           | 0.83(13.3, 23.3)         | -1.816 | 0.069 |
| Energy (kcal)     | 1169.83(1477.85, 1928.95) | 1278.35(1718.15, 3319.5) | -1.509 | 0.131 |
| Protein (g)       | 37.53(49.1, 66.35)        | 37.53(56, 100.18)        | -1.333 | 0.183 |
| Fat (g)           | 28.05(37.4, 59.85)        | 28.25(43.4, 66.15)       | -0.692 | 0.489 |
| Carbohydrates (g) | 178.63(226, 327.53)       | 181.63(296.05, 480.88)   | -1.892 | 0.059 |
| Dietary Fiber (g) | 9 (4.0, 11.98)            | 5.5(9.55, 19.2)          | -1.173 | 0.241 |

**Supplementary table 7 Baseline comparison of liver and kidney function and cytokines in frailty group**

|                                       | FM(n=50)             | FI(n=50)             | t/Z    | P     |
|---------------------------------------|----------------------|----------------------|--------|-------|
| Albumin/globulin                      | 1.28±0.19            | 1.29±0.15            | -0.35  | 0.727 |
| Albumin (g/L)                         | 39.3±9.23 c          | 39.04±7.28 d         | 0.155  | 0.877 |
| Alkaline phosphatase (U/L)            | 95.12±35.94 c        | 85.52±47.40          | 1.141  | 0.257 |
| Alanine aminotransferase (ALT, U/L)   | 16.76±17.18          | 16.00±15.19          | 0.234  | 0.815 |
| Aspartate Aminotransferase (AST, U/L) | 20.56±16.03 c        | 21.08±11.01          | -0.189 | 0.85  |
| AST/ALT                               | 1.51±0.48            | 1.46±0.40            | 0.631  | 0.529 |
| Urea (mmol/L)                         | 6.18±2.61            | 5.57±2.01            | 1.311  | 0.193 |
| Creatinine (μmol/L)                   | 65.98±28.72          | 65.92±21.46          | 0.012  | 0.991 |
| Cystatin C (mg/L)                     | 1.35±0.45            | 1.14±0.30            | 2.813  | 0.006 |
| Direct bilirubin (μmol/L)             | 3.80(2.35,4.95)      | 3.95(2.88,4.83)      | -0.462 | 0.644 |
| Globulin (g/L)                        | 29.62±9.86           | 29.29±7.35           | 0.191  | 0.849 |
| Gamma-glutamyltransferase (U/L)       | 17.00(12.00,30.00)   | 17(8.50,33.25)       | -0.266 | 0.791 |
| Indirect bilirubin (μmol/L)           | 5.30(3.10,9.18)      | 5.55(3.10,8.58)      | -0.314 | 0.754 |
| Total bilirubin (μmol/L)              | 8.10(4.85,13.60)     | 9.55(6.43,13.33)     | -0.662 | 0.508 |
| Total protein (g/L)                   | 67.92±17.84          | 68.33±13.67          | -0.129 | 0.898 |
| Uric acid (μmol/L)                    | 323.3±149.39         | 332.54±123.52        | -0.337 | 0.737 |
| IL-17(pg/ml)                          | 31.08 (19.02, 50.49) | 43.49 (23.07, 70.82) | -1.761 | 0.078 |
| γ-IFN (pg/ml)                         | 10.92 (8.09, 15.44)  | 9.98 (8.71, 11.87)   | -0.587 | 0.558 |
| IGF-1(ng/ml)                          | 67.46 (58.84, 75.85) | 65.69 (59.70, 77.17) | -0.393 | 0.694 |

The specific experimental methodology section is as follows:

### **16S sequencing**

1 Method 1.1 Extraction of genome DNA Total genome DNA from samples was extracted using CTAB/SDS method. DNA concentration and purity was monitored on 1% agarose gels. According to the concentration, DNA was diluted to 1ng/μl using sterile water. 1.2 Amplicon Generation Primer: Amplified region Primer V3-V4 341F: CCTAYGGGRBGCASCAG 806R: GGACTACNNGGGTATCTAAT V4 515F: GTGCCAGCMGCCGCGGTAA 806R GGACTACH VG G GTWTCTAAT 16S rRNA genes were amplified used the specific primer with the barcode. All PCR reactions were carried out in 30μL reactions with 15μL of Phusion® High-Fidelity PCR Master Mix (New England Biolabs); 0.2μM of forward and reverse primers, and about 10 ng template DNA. Thermal cycling consisted of initial denaturation at 98 °C for 1 min, followed by 30 cycles of denaturation at 98°C for 10 s, annealing at 50 °C for 30 s, and elongation at 72 °C for 60 s. Finally 72 °C for 5 min. 1.3 PCR Products quantification and qualification Mix same volume of 1X loading buffer (contained SYB green) with PCR products and operate electrophoresis on 2% agarose gel for detection. Samples with bright main strip between 400-450bp were chosen for further experiments. 1.4 PCR Products Mixing and Purification PCR products was mixed in equidensity ratios. Then, mixture PCR products was purified with AxyPrep DNA Gel Extraction Kit (AXYGEN). 1.5 Library preparation and sequencing Sequencing libraries were generated using NEB Next® Ultra™ DNA Library Prep Kit for Illumina (NEB, USA) following manufacturer's recommendations and index codes were added. The library quality was assessed on the Qubit® 2.0 Fluorometer (Thermo Scientific) and Agilent Bioanalyzer 2100 system. At last, the library was sequenced on an Illumina Novaseq 6000 platform and 250bp/300bp paired-end reads were generated. 2 Data analysis 2.1 Paired-end reads assemblies Paired-end reads from the original DNA fragments were merged using FLASH, a very fast and accurate analysis tool, which was designed to merge paired-end reads when at least some of the reads overlap the read generated from the opposite end of the same DNA fragment. Paired-end reads was assigned to each sample according to the unique barcodes. 2.2 OTU cluster and Species annotation Sequences analysis were performed by UPARSE software package using the UPARSE-OTU and UPARSE-OTUref algorithms. In-house Perl scripts were used to analyze alpha (within samples) and beta (among samples) diversity. Sequences with  $\geq 97\%$  similarity were assigned to the same OTUs. We pick a representative sequences for each OTU and use the RDP classifier to annotate taxonomic information for each representative sequence. In order to compute Alpha Diversity, we rarify the OTU table and calculate three metrics: Chao1 estimates the species abundance; Observed Species estimates the amount of unique OTUs found in each sample, and Shannon index. Rarefaction curves were generated based on these three metrics. 2.3 Phylogenics distance and community distribution Graphical representation of the relative abundance of bacterial diversity from phylum to species can be visualized using Krona chart. Cluster analysis was preceded by principal component analysis (PCA), which was applied to reduce the dimension of the original variables using the QIIME software package. QIIME calculates both weighted and unweighted unifracs distance, which are phylogenetic measures of beta diversity. We used unweighted unifracs distance for Principal Coordinate Analysis (PCoA) and Unweighted Pair Group Method with Arithmetic mean (UPGMA) Clustering. PCoA helps to get principal coordinates and visualize them from complex, multidimensional data. It takes a

transformation from a distance matrix to a new set of orthogonal axes. By which the maximum variation factor is demonstrated by first principal coordinate, and the second maximum one by the second principal coordinate, and so on. UPGMA Clustering is a type of hierarchical clustering method using average linkage and can be used to interpret the distance matrix. 2.4 Statistical analysis To confirm differences in the abundances of individual taxonomy between the two groups, STAMP software was utilized. LEfSe was used for the quantitative analysis of biomarkers within different groups. This method was designed to analyze data in which the number of species is much higher than the number of samples and to provide biological class explanations to establish statistical significance, biological consistency, and effect-size estimation of predicted biomarkers. To identify differences of microbial communities between the two groups, ANOSIM and ADONIS were performed based on the Bray-Curtis dissimilarity distance matrices

### **Untargeted metabolomics**

**Metabolite Extractions** To extract metabolites from the samples, 1 mL cold extraction solvent methanol/acetonitrile/H<sub>2</sub>O (2:2:1, v/v/v) was added to 80 mg sample, and adequately vortexed. After vortexing, the samples were incubated on ice for 20 minutes, and then centrifuged at 14,000 g for 20 minutes at 4°C, the supernatant was collected and flowed through a 96-well protein precipitation plate, and then the elution was collected and dried in a vacuum centrifuge at 4°C. For LC-MS analysis, the samples were re-dissolved in 100 µL acetonitrile/water (1:1, v/v) solvent and transferred to LC vials.

**LC-MS Analysis** For untargeted metabolomics of polar metabolites, extracts were analyzed using a quadrupole time-of-flight mass spectrometer (Sciex TripleTOF 6600) coupled to hydrophilic interaction chromatography via electrospray ionization in Shanghai Applied Protein Technology Co., Ltd. LC separation was on a ACQUITY UPLC BEH Amide column (2.1 mm × 100 mm, 1.7µm particle size (waters, Ireland) using a gradient of solvent A (25 mM ammonium acetate and 25 mM ammonium hydroxide in water) solvent B (acetonitrile). The gradient was 85% B for 1 min and was linearly reduced to 65% in 11 min, and then was reduced to 40% in 0.1 min and kept for 4 min, and then increased to 85% in 0.1 min, with a 5 min re-equilibration period employed. Flow rate was 0.4 mL/minute, column temperature was 25 °C, auto sampler temperature was 5°C, and injection volume was 2 µL. The mass spectrometer was operated in both negative ion and positive ionizations mode. The ESI source conditions were set as follows: Ion Source Gas1 (Gas1) as 60, Ion Source Gas2 (Gas2) as 60, curtain gas (CUR) as 30, source temperature: 600°C, IonSpray Voltage Floating (ISVF) ± 5500 V. In MS acquisition, the instrument was set to acquire over the m/z range 60-1000 Da, and the accumulation time for TOF MS scan was set at 0.20 s/spectra. In auto MS/MS acquisition, the instrument was set to acquire over the m/z range 25-1000 Da, and the accumulation time for product ion scan was set at 0.05 s/spectra. The product ion scan is acquired using information dependent acquisition (IDA) with high sensitivity mode selected. The parameters were set as follows: the collision energy (CE) was fixed at 35 V with ± 15 eV; declustering potential (DP), 60 V (+) and -60 V (-); exclude isotopes within 4 Da, candidate ions to monitor per cycle: 10. **Data Analysis** The raw MS data (wiff.scan files) were converted to MzXML files using ProteoWizard MSConvert before importing into freely available XCMS software. For peak picking, the following parameters were used: centWave m/z = 25 ppm, peakwidth = c (10,

60), prefilter = c (10, 100). For peak grouping, bw = 5, mzwid = 0.025, minfrac = 0.5 were used. In the extracted ion features, only the variables having more than 50% of the nonzero measurement values in at least one group were kept. Compound identification of metabolites by MS/MS spectra with an in-house database established with available authentic standards. After normalized to total peak intensity, the processed data were uploaded into before importing into SIMCA-P (version 14.1, Umetrics, Umea, Sweden), where it was subjected to multivariate data analysis, including Pareto-scaled principal component analysis (PCA) and orthogonal partial least-squares discriminant analysis (OPLS-DA). The 7-fold cross-validation and response permutation testing were used to evaluate the robustness of the model. The variable importance in the projection (VIP) value of each variable in the OPLS-DA model was calculated to indicate its contribution to the classification. Significance was determined using an unpaired Student's t test. VIP value >1 and p<0.05 was considered as statistically significant. Bioinformatics Analysis For KEGG pathway annotation, the metabolites were blasted against the online Kyoto Encyclopedia of Genes and Genomes (KEGG) database to retrieve their COs and were subsequently mapped to pathways in KEGG11. The corresponding KEGG pathways were extracted. To further explore the impact of differentially expressed metabolites, enrichment analysis was performed. KEGG pathway enrichment analyses were applied based on the Fisher' exact test, considering the whole metabolites of each pathway as background dataset. And only pathways with p-values under a threshold of 0.05 were considered as significant changed pathways. For hierarchical clustering, Cluster 3.0 (<http://bonsai.hgc.jp/~mdehoon/software/cluster/software.htm>) and the Java Treeview software (<http://jtreeview.sourceforge.net>) were used. Euclidean distance algorithm for similarity measure and average linkage clustering algorithm (clustering uses the centroids of the observations) for clustering were selected when performing hierarchical clustering. Heat map is often presented as a visual aid in addition to the dendrogram.
