# Supplementary material for: Prebiotics improve frailty status in community-dwelling older individuals in a double-blind, randomized, controlled trial
Source: JCI journal article supplement (doi:10.1172/jci176507), 2024-08-06
Supplement: sd2 [file 2]

301 Moved Permanently

# Moved Permanently

The document has moved here.
